# Supplementary material for: Thermodynamic and voltammetric study on carnosine and ferrocenyl-carnosine
Source: Royal Society of Chemistry journal article supplement (doi:10.1039/d2dt04093j), 2023-01-01
Supplement: d2dt04093j1.pdf [file d2dt04093j1.pdf]

SUPPLEMENTARY MATERIALS

## Thermodynamic and voltammetric studies on Carnosine and Ferrocenyl-carnosine for sensing applications

Chiara Abate,<sup>a</sup> Anna Piperno,<sup>a</sup> Alex Fragoso,<sup>b</sup> Ottavia Giuffrè,<sup>a</sup> Antonino Mazzaglia,<sup>c</sup> Angela Scala<sup>a</sup> and Claudia Foti\*<sup>a</sup>

<sup>a</sup> Dipartimento di Scienze Chimiche, Biologiche, Farmaceutiche ed Ambientali, Università di Messina, Viale Ferdinando Stagno d'Alcontres 31, 98166 Messina, Italy

<sup>b</sup> Nanobiotechnology & Bioanalysis Group, Departament d'Enginyeria Química, Universitat Rovira i Virgili, Avinguda Països Catalans 26, 43007, Tarragona, Spain

<sup>c</sup> Consiglio Nazionale delle Ricerche, Istituto per lo Studio dei Materiali Nanostrutturati (CNR-ISMN), URT di Messina c/o Dipartimento di Scienze Chimiche, Biologiche, Farmaceutiche ed Ambientali, Università di Messina, Viale Ferdinando Stagno d'Alcontres 31, 98166 Messina, Italy

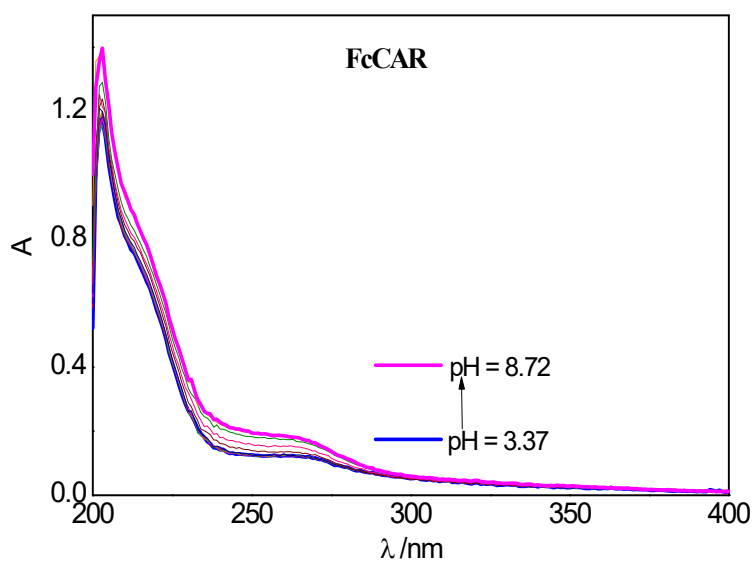

**Fig. S1.** Spectrophotometric titrations of the FcCAR (**L**) (0.1 mmol L<sup>-1</sup>) in NaCl aqueous solution at I = 0.15 mol L<sup>-1</sup> and T = 298.15 K.

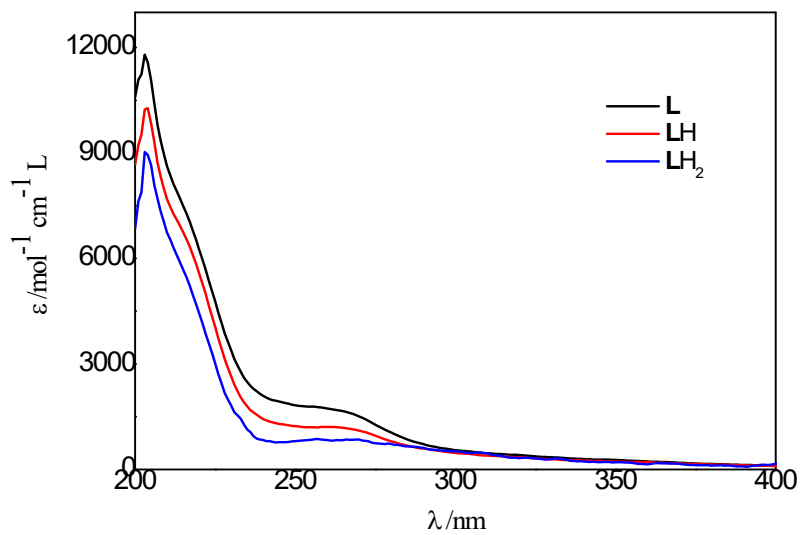

**Fig. S2.**  $\epsilon$  vs.  $\lambda$  of the differently deprotonated FcCAR (L) species in NaCl aqueous solution at  $I = 0.15 \text{ mol L}^{-1}$  and  $T = 298.15 \text{ K}$ .

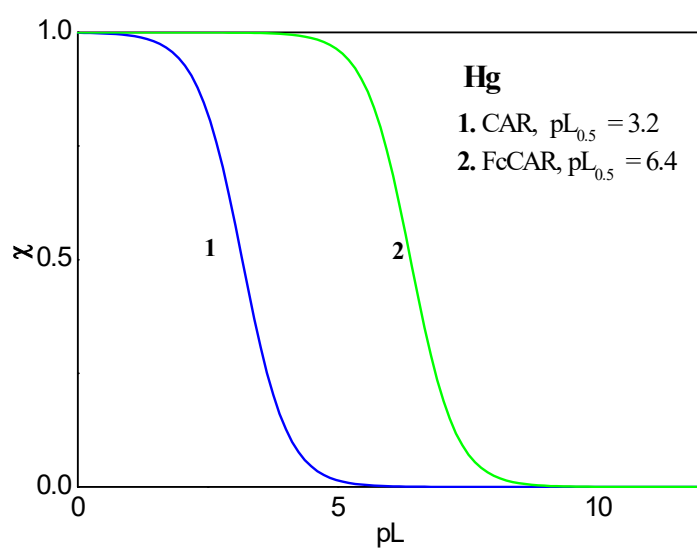

(a)

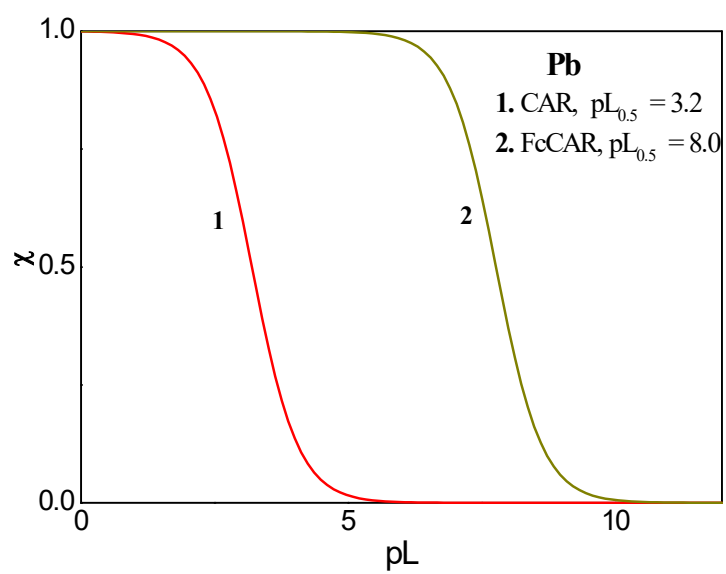

(b)

**Fig. S3.** Sequestering diagrams of CAR and FcCAR towards (a)  $Hg^{2+}$  and (b)  $Pb^{2+}$  at  $pH = 7.4$ ,  $I = 0.15 \text{ mol L}^{-1}$  (NaCl) and  $T = 298.15 \text{ K}$ .

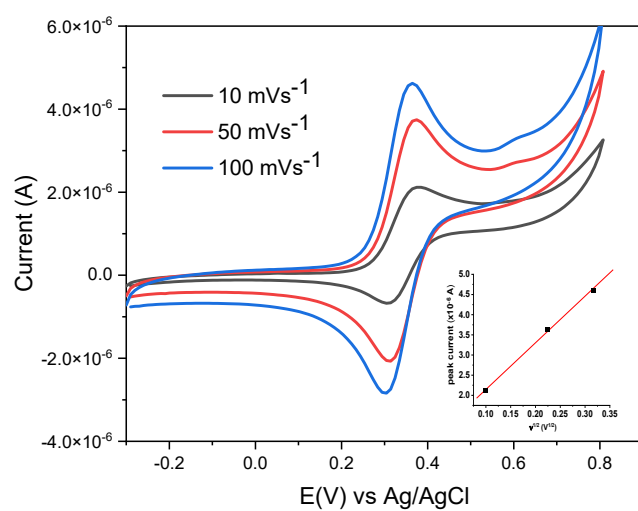

**Fig. S4.** CVs of FcCAR (1 mmol L<sup>-1</sup>) in 0.1 mol L<sup>-1</sup> KCl aqueous solution and rt at 10 mV s<sup>-1</sup>, 50 mV s<sup>-1</sup> and 100 mV s<sup>-1</sup> (pH = 7). Inset: plot of peak current vs. the square root of the scan rate with linear fit.
